# Supplementary material for: Genomic amplification of the caprine EDNRA locus might lead to a dose dependent loss of pigmentation
Source: PubMed Central journal article supplement (PMC4916431; doi:10.1038/srep28438), 2016-06-22
Supplement: srep28438-s1.pdf [file srep28438-s1.pdf]

**Title: Genomic amplification of the caprine *EDNRA* locus might lead to a dose dependent loss of pigmentation**

Authors: Fiona Menzi, Irene Keller, Irene Reber, Julia Beck, Bertram Brenig, Ekkehard Schütz, Tosso Leeb, Cord Drögemüller

### **Supplementary information**

PDF file

1. Additional\_Information.PDF

Supplementary Figures 1-2 and Supplementary Tables 1-2

**A**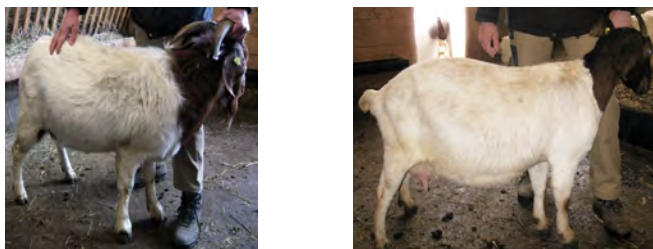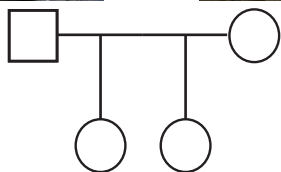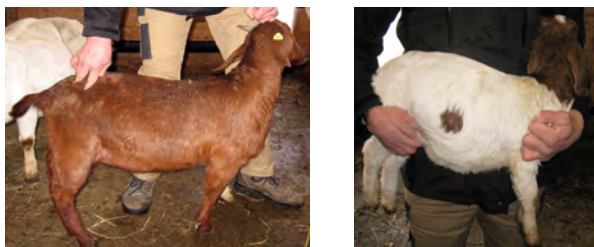**B**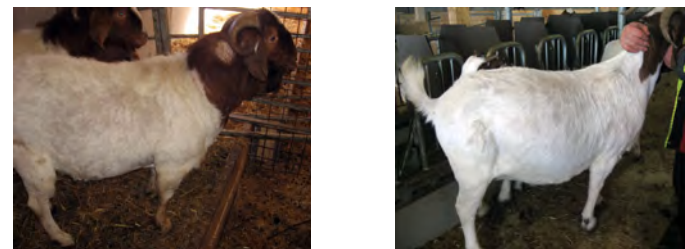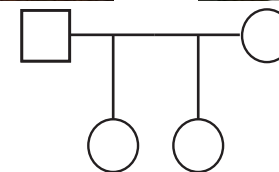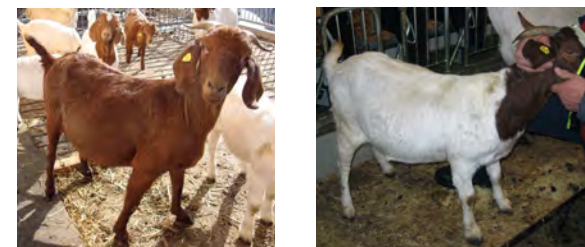**C**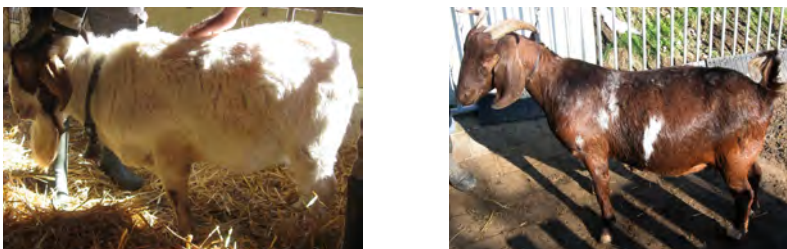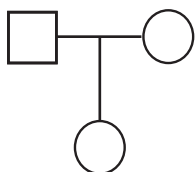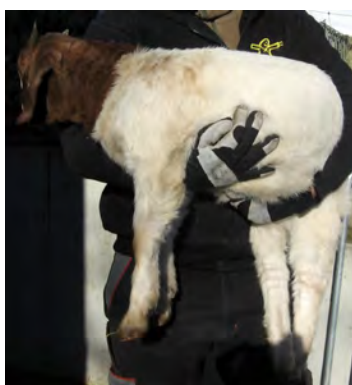**D**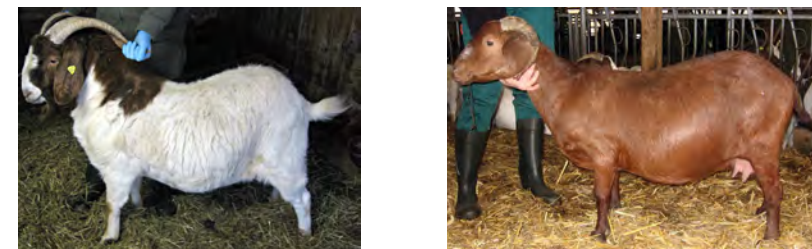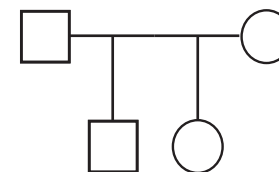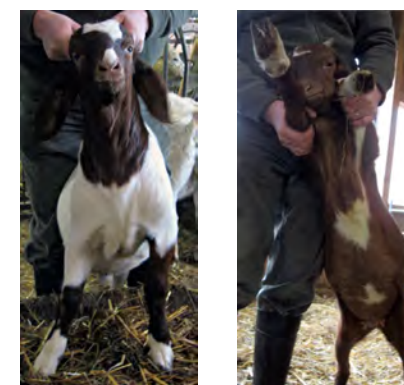

**Suppl. Fig. 1 Examples of coat color inheritance in Boer goats.**

(A+B) Note the occurrence of solid red colored lambs, lambs with red spots in the white area of the body, and traditional colored lambs born from two traditional colored parents. (C+D) Note the occurrence of lambs with red spots in the white area of the body, and traditional colored lambs born from matings of solid red colored and traditional colored parents.

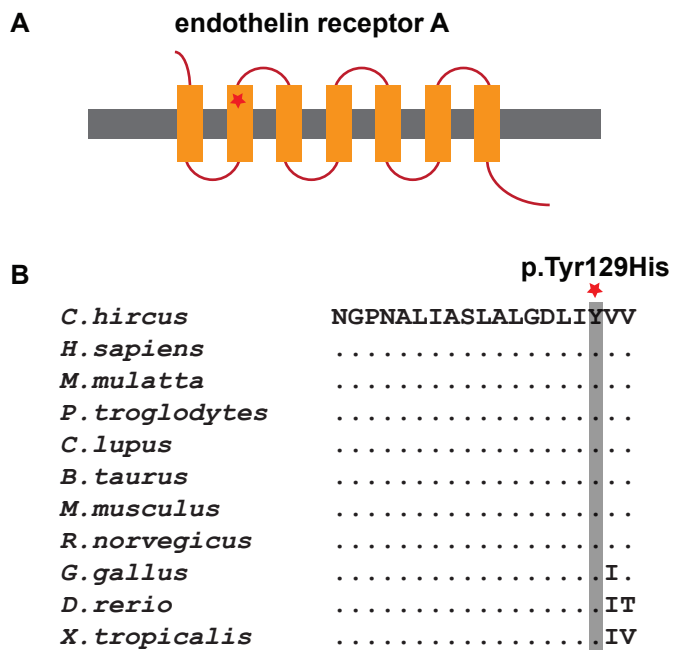

Suppl. Fig. 2 **Multispecies protein sequence alignment of EDNRA.**  
 (A) The protein consists of seven transmembrane domains (displayed in orange).  
 The p.Tyr129His mutation is indicated by a red star. (B) Note the high  
 conservation of the tyrosine at position 129 in all EDNRA homologs..

**Suppl. Tab. 1 Ten best associated SNP markers for coat color differences in Boer goats.**

Eight SNPs (of which seven are on chromosome 17) showed a genome-wide significant association (threshold indicated by a red line).

| <b>rs number</b> | <b>SNP</b>                   | <b>chr</b> | <b>position</b> | <b>A1</b> | <b>A2</b> | <b>N</b> | <b>effB</b> | <b>se_effB</b> | <b>chi2.1df</b> | <b>P1df</b>  | <b>Pc1df</b> |
|------------------|------------------------------|------------|-----------------|-----------|-----------|----------|-------------|----------------|-----------------|--------------|--------------|
| rs268287000      | snp55406-scaffold858-1197053 | 17         | 10'577'664      | G         | A         | 187      | -0.4691956  | 0.05669374     | 68.49165        | 1.274163E-16 | 2.079603E-15 |
| rs268264927      | snp32749-scaffold379-151202  | 17         | 11'926'018      | A         | G         | 187      | -0.3477676  | 0.04729820     | 54.06162        | 1.942992E-13 | 1.775484E-12 |
| rs268286979      | snp55385-scaffold858-292727  | 17         | 11'481'990      | G         | A         | 187      | -0.3308322  | 0.04760075     | 48.30453        | 3.649075E-12 | 2.645489E-11 |
| rs268245303      | snp12503-scaffold1479-728936 | 17         | 8'698'303       | T         | C         | 187      | -0.2188954  | 0.03735236     | 34.34292        | 4.620780E-09 | 1.910617E-08 |
| rs268286973      | snp55379-scaffold858-66034   | 17         | 11'708'683      | A         | G         | 183      | -0.2105514  | 0.03665209     | 33.00037        | 9.214127E-09 | 3.609544E-08 |
| rs268286576      | snp54969-scaffold840-1593888 | 29         | 16'642'349      | C         | T         | 187      | -0.4774763  | 0.09023900     | 27.99722        | 1.214896E-07 | 3.891218E-07 |
| rs268287011      | snp55417-scaffold858-1731348 | 17         | 10'043'369      | C         | T         | 187      | -0.3259177  | 0.06211019     | 27.53532        | 1.542518E-07 | 4.849542E-07 |
| rs268245299      | snp12499-scaffold1479-571823 | 17         | 8'541'190       | A         | G         | 187      | -0.2357979  | 0.04585936     | 26.43771        | 2.721753E-07 | 8.187017E-07 |
| rs268234705      | snp1616-scaffold1046-857683  | 19         | 15'060'421      | A         | G         | 185      | -0.3323220  | 0.06569107     | 25.59208        | 4.217672E-07 | 1.226198E-06 |
| rs268286982      | snp55388-scaffold858-438489  | 17         | 11'336'228      | A         | G         | 187      | -0.1665744  | 0.03339274     | 24.88356        | 6.089965E-07 | 1.720719E-06 |

















|          |    |    |     |     |     |     |     |     |     |     |     |     |     |     |                                          |
|----------|----|----|-----|-----|-----|-----|-----|-----|-----|-----|-----|-----|-----|-----|------------------------------------------|
| 11703468 | A  | G  | 0/1 | 0/0 | 0/0 | 0/0 | 0/0 | 0/0 | 0/0 | 0/0 | 0/0 | 0/0 | 0/0 | 0/0 | INTRON(MODIFIER)(SLC10A7)(ma184825)      |
| 11705778 | A  | C  | 0/1 | 0/0 | 0/0 | 0/0 | 0/0 | 0/0 | 0/0 | 0/0 | 0/0 | 0/0 | 0/0 | 0/0 | INTRON(MODIFIER)(SLC10A7)(ma184825)      |
| 11737463 | G  | T  | 0/1 | 0/0 | 0/0 | 0/0 | 0/0 | 0/0 | 0/0 | 0/0 | 0/0 | 0/0 | 0/0 | 0/0 | INTRON(MODIFIER)(SLC10A7)(ma184825)      |
| 11740330 | C  | T  | 0/1 | 0/0 | 0/0 | 0/0 | 0/0 | 0/0 | 0/0 | 0/0 | 0/0 | 0/0 | 0/0 | 0/0 | INTRON(MODIFIER)(SLC10A7)(ma184825)      |
| 11792289 | T  | C  | 0/1 | 0/0 | 0/0 | 0/0 | 0/0 | 0/0 | 0/0 | 0/0 | 0/0 | 0/0 | 0/0 | 0/0 | INTRON(MODIFIER)(SLC10A7)(ma184825)      |
| 11792419 | T  | C  | 0/1 | 0/0 | 0/0 | 0/0 | 0/0 | 0/0 | 0/0 | 0/0 | 0/0 | 0/0 | 0/0 | 0/0 | INTRON(MODIFIER)(SLC10A7)(ma184825)      |
| 11793235 | C  | T  | 0/1 | 0/0 | 0/0 | 0/0 | 0/0 | 0/0 | 0/0 | 0/0 | 0/0 | 0/0 | 0/0 | 0/0 | INTRON(MODIFIER)(SLC10A7)(ma184825)      |
| 11795248 | A  | C  | 1/1 | 0/0 | 0/0 | 0/0 | 0/0 | 0/0 | 0/0 | 0/0 | 0/0 | 0/0 | 0/0 | 0/0 | INTRON(MODIFIER)(SLC10A7)(ma184825)      |
| 11754362 | G  | G  | 0/1 | 0/0 | 0/0 | 0/0 | 0/0 | 0/0 | 0/0 | 0/0 | 0/0 | 0/0 | 0/0 | 0/0 | INTRON(MODIFIER)(SLC10A7)(ma184825)      |
| 11754742 | A  | G  | 0/1 | 0/0 | 0/0 | 0/0 | 0/0 | 0/0 | 0/0 | 0/0 | 0/0 | 0/0 | 0/0 | 0/0 | INTRON(MODIFIER)(SLC10A7)(ma184825)      |
| 11754898 | AG | A  | 0/1 | 0/0 | 0/0 | 0/0 | 0/0 | 0/0 | 0/0 | 0/0 | 0/0 | 0/0 | 0/0 | 0/0 | INTRON(MODIFIER)(SLC10A7)(ma184825)      |
| 11705195 | G  | GT | 0/1 | 0/0 | 0/0 | 0/0 | 0/0 | 0/0 | 0/0 | 0/0 | 0/0 | 0/0 | 0/0 | 0/0 | INTRON(MODIFIER)(SLC10A7)(ma184825)      |
| 11755534 | T  | C  | 0/1 | 0/0 | 0/0 | 0/0 | 0/0 | 0/0 | 0/0 | 0/0 | 0/0 | 0/0 | 0/0 | 0/0 | INTRON(MODIFIER)(SLC10A7)(ma184825)      |
| 11759276 | G  | A  | 0/1 | 0/0 | 0/0 | 0/0 | 0/0 | 0/0 | 0/0 | 0/0 | 0/0 | 0/0 | 0/0 | 0/0 | INTRON(MODIFIER)(SLC10A7)(ma184825)      |
| 11757498 | A  | A  | 0/1 | 0/0 | 0/0 | 0/0 | 0/0 | 0/0 | 0/0 | 0/0 | 0/0 | 0/0 | 0/0 | 0/0 | INTRON(MODIFIER)(SLC10A7)(ma184825)      |
| 11802165 | G  | GT | 0/1 | 0/0 | 0/0 | 0/0 | 0/0 | 0/0 | 0/0 | 0/0 | 0/0 | 0/0 | 0/0 | 0/0 | INTRON(MODIFIER)(SLC10A7)(ma184825)      |
| 11802688 | T  | C  | 0/1 | 0/0 | 0/0 | 0/0 | 0/0 | 0/0 | 0/0 | 0/0 | 0/0 | 0/0 | 0/0 | 0/0 | INTRON(MODIFIER)(SLC10A7)(ma184825)      |
| 11804205 | A  | G  | 0/1 | 0/0 | 0/0 | 0/0 | 0/0 | 0/0 | 0/0 | 0/0 | 0/0 | 0/0 | 0/0 | 0/0 | INTRON(MODIFIER)(SLC10A7)(ma184825)      |
| 11808752 | A  | G  | 0/1 | 0/0 | 0/0 | 0/0 | 0/0 | 0/0 | 0/0 | 0/0 | 0/0 | 0/0 | 0/0 | 0/0 | INTRON(MODIFIER)(SLC10A7)(ma184825)      |
| 11809466 | A  | T  | 0/1 | 0/0 | 0/0 | 0/0 | 0/0 | 0/0 | 0/0 | 0/0 | 0/0 | 0/0 | 0/0 | 0/0 | INTRON(MODIFIER)(SLC10A7)(ma184825)      |
| 11811384 | G  | A  | 0/1 | 0/0 | 0/0 | 0/0 | 0/0 | 0/0 | 0/0 | 0/0 | 0/0 | 0/0 | 0/0 | 0/0 | INTRON(MODIFIER)(SLC10A7)(ma184825)      |
| 11813564 | T  | T  | 0/1 | 0/0 | 0/0 | 0/0 | 0/0 | 0/0 | 0/0 | 0/0 | 0/0 | 0/0 | 0/0 | 0/0 | INTRON(MODIFIER)(SLC10A7)(ma184825)      |
| 11816924 | C  | T  | 0/1 | 0/0 | 0/0 | 0/0 | 0/0 | 0/0 | 0/0 | 0/0 | 0/0 | 0/0 | 0/0 | 0/0 | INTRON(MODIFIER)(SLC10A7)(ma184825)      |
| 11820590 | C  | A  | 0/1 | 0/0 | 0/0 | 0/0 | 0/0 | 0/0 | 0/0 | 0/0 | 0/0 | 0/0 | 0/0 | 0/0 | INTRON(MODIFIER)(SLC10A7)(ma184825)      |
| 11861143 | A  | G  | 0/1 | 0/0 | 0/0 | 0/0 | 0/0 | 0/0 | 0/0 | 0/0 | 0/0 | 0/0 | 0/0 | 0/0 | INTERGENIC(MODIFIER)                     |
| 11902395 | G  | G  | 0/1 | 0/0 | 0/0 | 0/0 | 0/0 | 0/0 | 0/0 | 0/0 | 0/0 | 0/0 | 0/0 | 0/0 | INTERGENIC(MODIFIER)                     |
| 11896505 | G  | C  | 0/1 | 0/0 | 0/0 | 0/0 | 0/0 | 0/0 | 0/0 | 0/0 | 0/0 | 0/0 | 0/0 | 0/0 | INTRON(MODIFIER)(LOC102175607)(ma184871) |
| 11928504 | G  | C  | 0/1 | 0/0 | 0/0 | 0/0 | 0/0 | 0/0 | 0/0 | 0/0 | 0/0 | 0/0 | 0/0 | 0/0 | INTERGENIC(MODIFIER)                     |
| 11972462 | G  | A  | 0/1 | 0/0 | 0/0 | 0/0 | 0/0 | 0/0 | 0/0 | 0/0 | 0/0 | 0/0 | 0/0 | 0/0 | INTERGENIC(MODIFIER)                     |
| 11874523 | T  | C  | 0/1 | 0/0 | 0/0 | 0/0 | 0/0 | 0/0 | 0/0 | 0/0 | 0/0 | 0/0 | 0/0 | 0/0 | INTERGENIC(MODIFIER)                     |
| 11868541 | C  | A  | 0/1 | 0/0 | 0/0 | 0/0 | 0/0 | 0/0 | 0/0 | 0/0 | 0/0 | 0/0 | 0/0 | 0/0 | INTERGENIC(MODIFIER)                     |
